# Supplementary material for: Sensitive determination of neodymium isotope in seawater by multi-collector inductively coupled plasma mass spectrometry with ultrasound nebulization-dielectric barrier discharge vapor generation as sample introduction
Source: Royal Society of Chemistry journal article supplement (doi:10.1039/d4ja00106k), 2024-01-01
Supplement: d4ja00106k1.pdf [file d4ja00106k1.pdf]

## Supporting Information

### **Sensitive determination of neodymium isotope in seawater by multi-collector inductively coupled plasma mass spectrometry with ultrasound nebulization-dielectric barrier discharge vapor generation as sample introduction**

Dongyong Li,<sup>1</sup> Guanghao Cui,<sup>2</sup> Shanshan Chen,<sup>2</sup> Yifan Qiao,<sup>2</sup> Qian Liu,<sup>3</sup> Jing Zhang,<sup>4</sup> Qian He<sup>3\*</sup>

<sup>1</sup>*Frontiers Science Center for Deep Ocean Multispheres and Earth System, Key Lab of Submarine Geosciences and Prospecting Techniques, MOE and College of Marine Geosciences, Ocean University of China, Qingdao, 266100, China*

<sup>2</sup>*College of Chemistry and Chemical Engineering, Ocean University of China, Qingdao, 266100, China*

<sup>3</sup>*Frontiers Science Center for Deep Ocean Multispheres and Earth System, and Key Laboratory of Marine Chemistry Theory and Technology, Ministry of Education, Ocean University of China, Qingdao 266100, China*

<sup>4</sup>*Faculty of Science, University of Toyama, Toyama 930-8555, Japan*

*\*Corresponding author email: [heqian@ouc.edu.cn](mailto:heqian@ouc.edu.cn)*

## Table of Contents

Sample pretreatment processes for Nd isotopic analysis in seawater.

Fig. S1 The memory effect of <sup>144</sup>Nd (10 µg L<sup>-1</sup> Nd) by UNDBD sample introduction system. 600 µL of 2% (v/v) nitric acid blank is used for each rinse.

Table S1 Instrumental parameters of MC-ICP-MS for Nd isotopic analysis.

Table S2 The results of Nd isotopic ratios in the feed solution and the waste solution in GLS measured by MC-ICP-MS with dry plasma mode.

### **Sample pretreatment processes for Nd isotopic analysis in seawater**

First, the entire extraction setup was cleaned with 5 mL of 1 mol L<sup>-1</sup> HNO<sub>3</sub> solution and 60 mL of Milli-Q water in turn. And the pH of the NOBIAS resin column was adjusted using 5 mL of 0.05 mol L<sup>-1</sup> NH<sub>4</sub>Ac buffer solution. Then, 5 L of seawater sample was used and adjusted to pH of 4.65-4.75. Next, the seawater sample was passed through the NOBIAS resin column, where the rare earth elements were adsorbed on the resin. Then 0.05 mol L<sup>-1</sup> NH<sub>4</sub>Ac buffer solution was used to remove the residual K<sup>+</sup>, Na<sup>+</sup>, Ca<sup>2+</sup>, Mg<sup>2+</sup> and other impurity ions. Following, 1 mol L<sup>-1</sup> HNO<sub>3</sub> solution was used to elute the rare earth elements from the resin. Finally, the enriched rare earth element solution was passed through the LN-C50-A resin column to separate Nd from Sm. 13 mL of 0.25 mol L<sup>-1</sup> HCl solution was used as elution solution and the later 8 mL of effluent was used for Nd isotopic analysis. Before determination by MC-ICP-MS, the 8 mL of effluent was vaporized to 2 mL to further enrich the concentration of Nd.

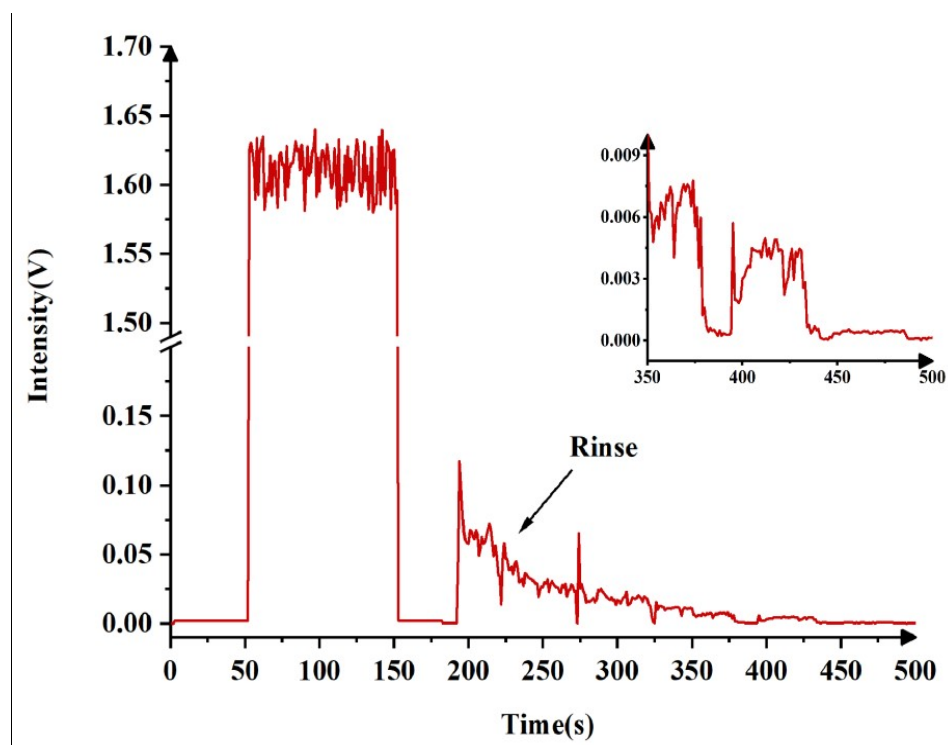

Fig. S1 The memory effect of  $^{144}\text{Nd}$  ( $10 \mu\text{g L}^{-1}$  Nd) by UNDBD sample introduction system.  $600 \mu\text{L}$  of 2% (v/v) nitric acid blank is used for each rinse.

Table S1 Instrumental parameters of MC-ICP-MS for Nd isotopic analysis.

| Parameters                                | Values                                    |
|-------------------------------------------|-------------------------------------------|
| RF power                                  | 1150 W                                    |
| Cool gas                                  | 16 L min <sup>-1</sup>                    |
| Auxiliary gas                             | 0.8 L min <sup>-1</sup>                   |
| Sample gas                                | 1.05 L min <sup>-1</sup>                  |
| Mass resolution                           | Low                                       |
| Cycles/blocks                             | 100 cycles/1 block                        |
| Sample/skimmer cones                      | Sample + 'H'                              |
| Integration time                          | 1.049 s                                   |
| Nebulizer                                 | PFA microflow (100 μL min <sup>-1</sup> ) |
| Aridus III Ar sweep gas                   | 4.0-5.0 L min <sup>-1</sup>               |
| Aridus III N <sub>2</sub> gas             | 0.0 mL min <sup>-1</sup>                  |
| Aridus III spray chamber (heater/chiller) | 140/110°C                                 |

Table S2 The results of Nd isotopic ratios in the feed solution and the waste solution in GLS measured by MC-ICP-MS with dry plasma mode.

| Nd isotopic ratio                    | Feed solution     | Waste solution    | Bias <sup>a</sup> |
|--------------------------------------|-------------------|-------------------|-------------------|
| <sup>143</sup> Nd/ <sup>144</sup> Nd | 0.507809±0.000023 | 0.503633±0.000043 | 8.2%              |

<sup>a</sup>Bias= (waste solution value / feed solution value) -1, n=5.
